# Supplementary material for: Enhanced NIR emission and thermal stability of La2MgSnO6:Mn4+,Ni2+via energy transfer
Source: Royal Society of Chemistry journal article supplement (doi:10.1039/d4tc02392g), 2024-01-01
Supplement: d4tc02392g1.pdf [file d4tc02392g1.pdf]

## Enhanced NIR Emission and Thermal Stability of $\text{La}_2\text{MgSnO}_6$ : $\text{Mn}^{4+}$ , $\text{Ni}^{2+}$ via Energy Transfer

Yuhao Liu,<sup>a</sup> Cong Dou,<sup>a</sup> Fan Dou,<sup>b</sup> Zihan Zhang,<sup>a</sup> Xuan Gao,<sup>c</sup> Hongzhe Zhang,<sup>a</sup> Sitong Wang,<sup>a</sup>  
Xiaoming Wang<sup>\*a</sup> and Huan Jiao<sup>\*a</sup>

Electronic Supplementary Information (ESI):

### Table of Contents

|                                                                                                                                   |   |
|-----------------------------------------------------------------------------------------------------------------------------------|---|
| <b>Table S1</b> Data for the Rietveld refinement of LMS: 0.6% $\text{Mn}^{4+}$ , 2.5% $\text{Ni}^{2+}$ .....                      | 2 |
| <b>Table S2</b> Main parameters of processing and refinement results of LMS: $\text{Ni}^{2+}$ ( $x = 0.005$ - $0.03$ ) .<br>..... | 3 |
| <b>Table S3</b> Main parameters of processing and refinement results of LMS: $\text{Mn}^{4+}$ ( $z = 0.002$ -<br>$0.012$ ). ..... | 4 |

**Table S1** Data for the Rietveld refinement of LMS: 0.6%Mn<sup>4+</sup>, 2.5%Ni<sup>2+</sup>.

| Chemical formula           | LMS: 0.6%Mn <sup>4+</sup> , 2.5%Ni <sup>2+</sup>                        |
|----------------------------|-------------------------------------------------------------------------|
| Crystal system             | Monoclinic                                                              |
| Space group                | <i>P2<sub>1</sub>/n</i> (No. 14)                                        |
| Cell Parameters /Å         | <i>a</i> = 5.64362(6)<br><i>b</i> = 5.72584(5)<br><i>c</i> = 8.02780(8) |
| Cell volume/Å <sup>3</sup> | 259.414(4)                                                              |
| Formula units /cell        | <i>Z</i> = 2                                                            |
| Structure refinement       | Topas 5.0                                                               |
| Temperature (K)            | 293                                                                     |
| Profile function           | PV_TCHZ                                                                 |
| Radiation                  | Cu Kα                                                                   |
| 2θ range (°)               | 10-120                                                                  |
| Step size (°)              | 0.02                                                                    |
| <i>R</i> <sub>wp</sub> (%) | 4.77                                                                    |
| <i>R</i> <sub>p</sub> (%)  | 3.57                                                                    |
| GOF                        | 1.42                                                                    |

**Table S2** Main parameters of processing and refinement results of LMS:Ni<sup>2+</sup> (x =

| Compound                     | x = 0.005               | z = 0.010               | x = 0.015               | x = 0.020               | x = 0.025               | x = 0.030               |
|------------------------------|-------------------------|-------------------------|-------------------------|-------------------------|-------------------------|-------------------------|
| Space group                  | <i>P2<sub>1</sub>/n</i> | <i>P2<sub>1</sub>/n</i> | <i>P2<sub>1</sub>/n</i> | <i>P2<sub>1</sub>/n</i> | <i>P2<sub>1</sub>/n</i> | <i>P2<sub>1</sub>/n</i> |
| <i>a</i> , (Å)               | 5.6446                  | 5.6445                  | 5.6440                  | 5.6436                  | 5.6424                  | 5.6414                  |
| <i>b</i> , (Å)               | 5.7250                  | 5.7245                  | 5.7243                  | 5.7242                  | 5.7238                  | 5.7235                  |
| <i>c</i> , (Å)               | 8.0296                  | 8.0294                  | 8.0291                  | 8.0287                  | 8.0263                  | 8.0256                  |
| <i>V</i> , (Å <sup>3</sup> ) | 259.48                  | 259.45                  | 259.44                  | 259.32                  | 259.22                  | 259.20                  |
| <i>Z</i>                     | 2                       | 2                       | 2                       | 2                       | 2                       | 2                       |
| 2 $\theta$ (°)               | 10-120                  | 10-120                  | 10-120                  | 10-120                  | 10-120                  | 10-120                  |
| <i>R</i> <sub>wp</sub> (%)   | 9.58                    | 10.13                   | 10.02                   | 9.36                    | 9.75                    | 9.92                    |
| <i>R</i> <sub>p</sub> (%)    | 7.08                    | 7.34                    | 7.81                    | 6.78                    | 7.12                    | 7.16                    |
| GOF                          | 1.27                    | 1.25                    | 1.21                    | 1.13                    | 1.12                    | 1.19                    |

0.005-0.03) .

**Table S3** Main parameters of processing and refinement results of LMS:Mn<sup>4+</sup> (z = 0.002-0.012).

| Compound                     | z = 0.002               | z = 0.004               | z = 0.006               | z = 0.008               | z = 0.01                | z = 0.012               |
|------------------------------|-------------------------|-------------------------|-------------------------|-------------------------|-------------------------|-------------------------|
| Space group                  | <i>P2<sub>1</sub>/n</i> | <i>P2<sub>1</sub>/n</i> | <i>P2<sub>1</sub>/n</i> | <i>P2<sub>1</sub>/n</i> | <i>P2<sub>1</sub>/n</i> | <i>P2<sub>1</sub>/n</i> |
| <i>a</i> , (Å)               | 5.6445                  | 5.6442                  | 5.6440                  | 5.6436                  | 5.6433                  | 5.6424                  |
| <i>b</i> , (Å)               | 5.7250                  | 5.7245                  | 5.7241                  | 5.7238                  | 5.7235                  | 5.7233                  |
| <i>c</i> , (Å)               | 8.0296                  | 8.0294                  | 8.0291                  | 8.0287                  | 8.0280                  | 8.0265                  |
| <i>V</i> , (Å <sup>3</sup> ) | 259.478                 | 259.449                 | 259.439                 | 259.406                 | 259.300                 | 259.291                 |
| <i>Z</i>                     | 2                       | 2                       | 2                       | 2                       | 2                       | 2                       |
| 2 $\theta$ (°)               | 10-120                  | 10-120                  | 10-120                  | 10-120                  | 10-120                  | 10-120                  |
| <i>R</i> <sub>w</sub> (%)    | 9.68                    | 10.22                   | 10.43                   | 9.32                    | 9.95                    | 9.98                    |
| <i>R</i> <sub>p</sub> (%)    | 7.18                    | 7.24                    | 7.91                    | 6.82                    | 7.22                    | 7.36                    |
| GOF                          | 1.17                    | 1.23                    | 1.23                    | 1.13                    | 1.24                    | 1.28                    |
